# Supplementary material for: In-plane ferroelectricity in few-layered GeS and its van der Waals ferroelectric diodes
Source: Royal Society of Chemistry journal article supplement (doi:10.1039/d1nr03807a), 2021-01-01
Supplement: d1nr03807a1.pdf [file d1nr03807a1.pdf]

# Electronic Supplementary Information

## **In-plane Ferroelectricity in Few-Layered GeS and its van der Waals Ferroelectric Diodes**

*Yong Yan*<sup>a, \*</sup>, *Qunrui Deng*<sup>a</sup>, *Shasha Li*<sup>a</sup>, *Tao Guo*<sup>b</sup>, *Xueping Li*<sup>a</sup>, *Yurong Jiang*<sup>a</sup>, *Xiaohui Song*<sup>a</sup>, *Wen Huang*<sup>c</sup>, *Juehan Yang*<sup>d</sup> and *Congxin Xia*<sup>a, \*</sup>

- a. School of Physics, Henan Key Laboratory of Photovoltaic Materials, Henan Normal University, Henan 453007, China. E-mail: [yanyong@htu.edu.cn](mailto:yanyong@htu.edu.cn)*
- b. Department of Mechanical and Mechatronics Engineering, Waterloo Institute for Nanotechnology, Centre for Advanced Materials Joining, University of Waterloo, Waterloo, Ontario N2L 3G1, Canada.*
- c. New Energy Technology Engineering Laboratory of Jiangsu Province & School of Science, Nanjing University of Posts and Telecommunications (NJUPT), Nanjing 210023, China*
- d. State Key Laboratory of Superlattices and Microstructures, Institute of Semiconductors, Chinese Academy of Sciences & Center of Materials Science and Optoelectronics Engineering, University of Chinese Academy of Sciences, Beijing 100083, China*

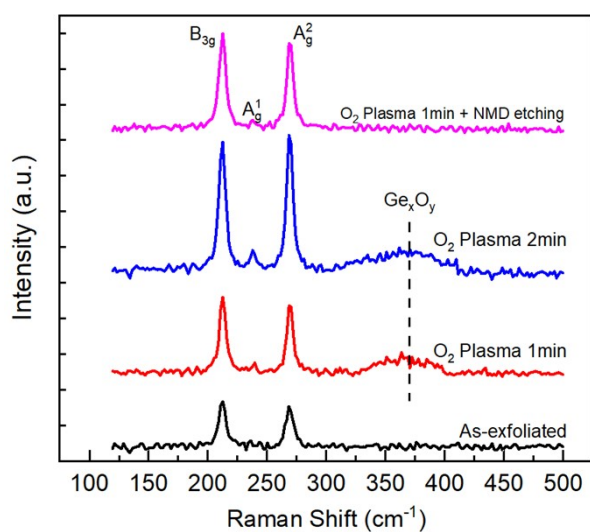

Figure S1 Raman studies of GeS flakes fabricated by exfoliation, O<sub>2</sub> plasma oxidation and NMD etching.

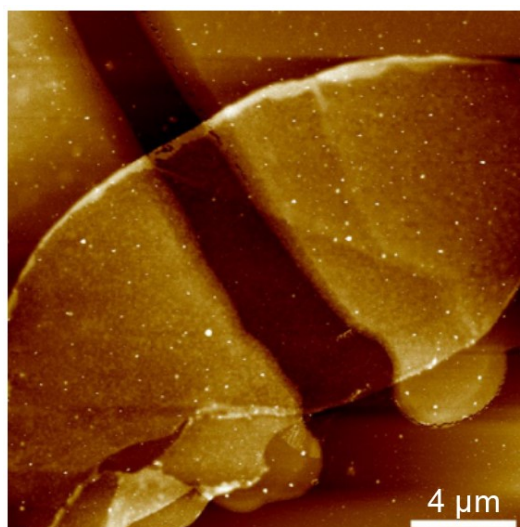

Figure S2 AFM image of the few-layer GeS nanoflake.

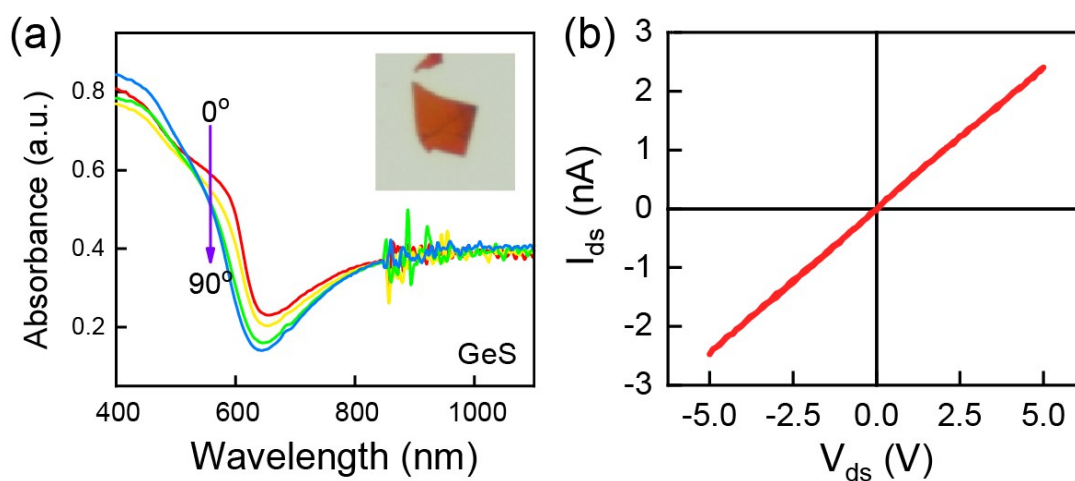

Figure S3 (a) Polarization-resolved absorption spectra with spectral range 400–1100 nm. (b) I-V plot of the thicker GeS sample.

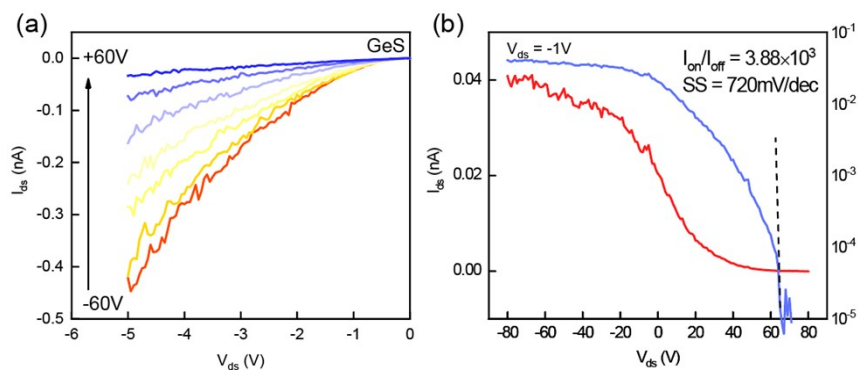

Figure S4 Typical output (a) and transfer (b) curves along the armchair direction.

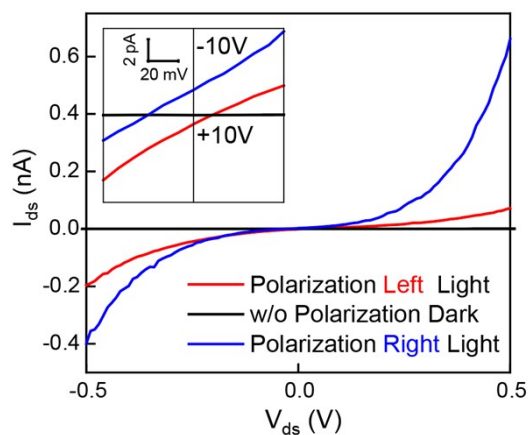

Figure S5 Light and dark I-V measurements before and after polarization, respectively.

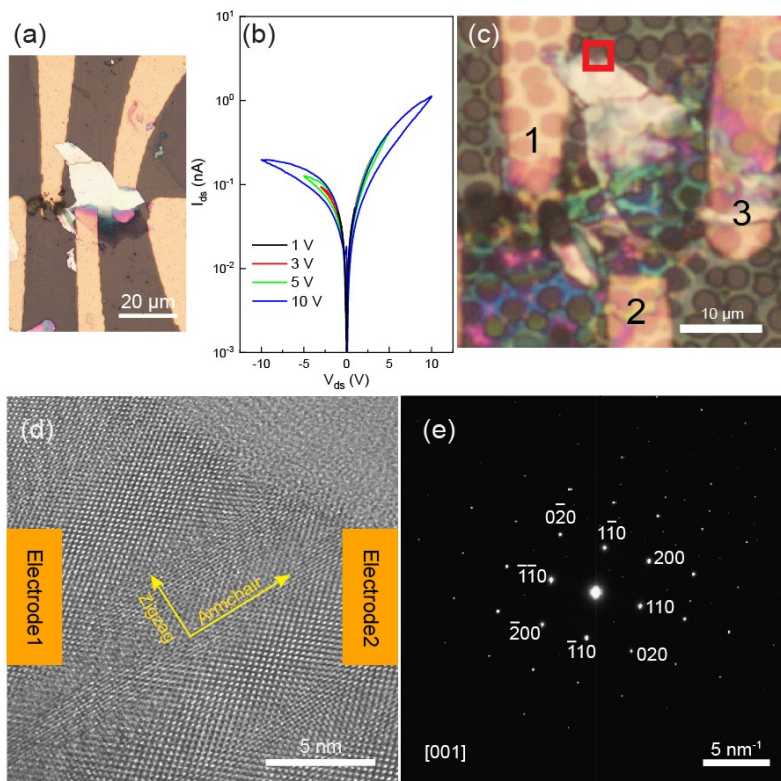

Figure S6 (a) Optical microscope image of the GeS device with three probes on SiO<sub>2</sub>/Si substrate. (b) I-V curves of the GeS device in (a). (c) Optical microscope image of the GeS device transferred onto TEM copper grids. The electrode 2 was detached during the transfer process (d) The

magnified ADF images taken from the areas marked by red square in (c). Scale bar 5 nm. (e) SAED pattern taken from (d).

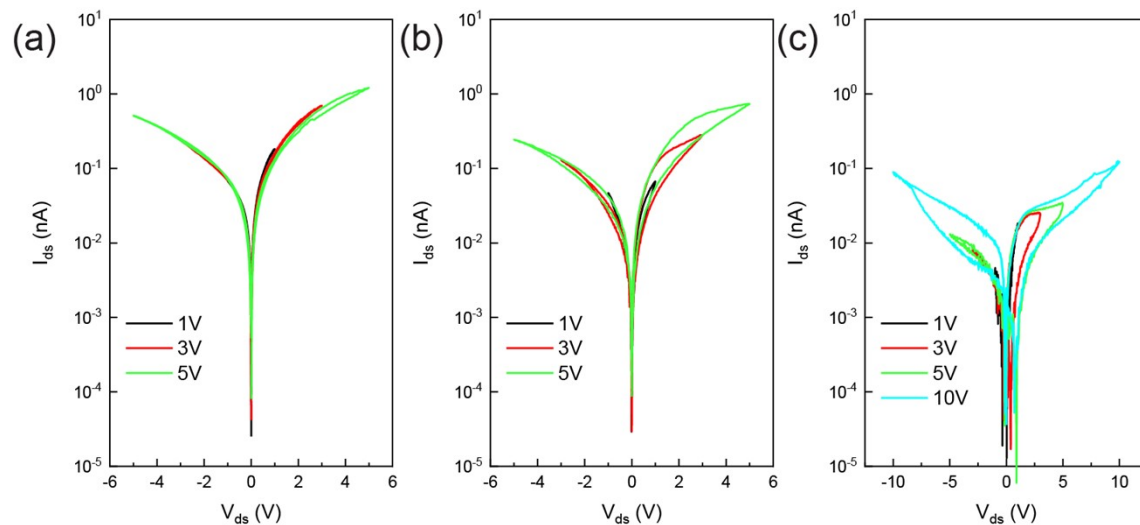

Figure S7 The I-V hysteresis loops for GeS devices with different thickness: (a) 88.94 nm, (b) 43.75 nm and (c) 5.25 nm.

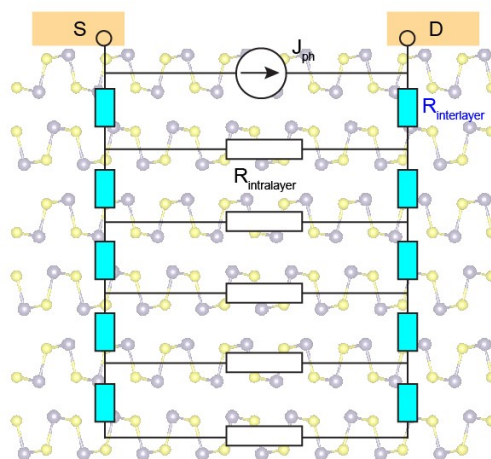

Figure S8 Resistance network model for the GeS BPV device.

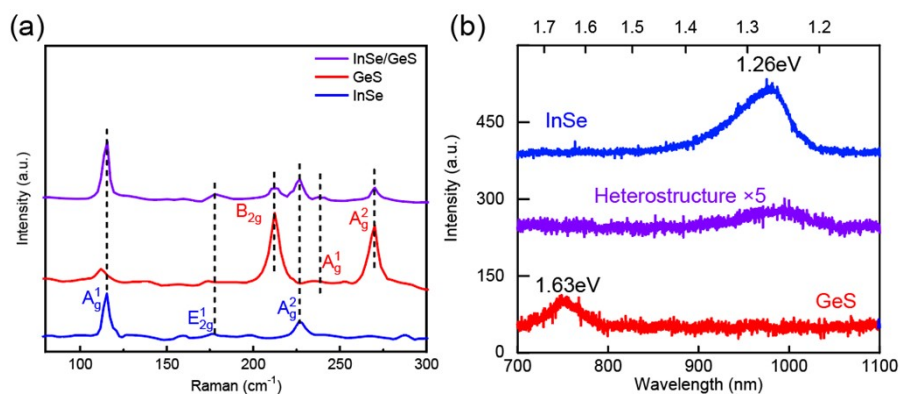

Figure S9 (a) Raman spectra of InSe, GeS and the heterojunction of InSe and GeS. (b) PL spectra of GeS, InSe and the heterojunction of InSe and GeS.

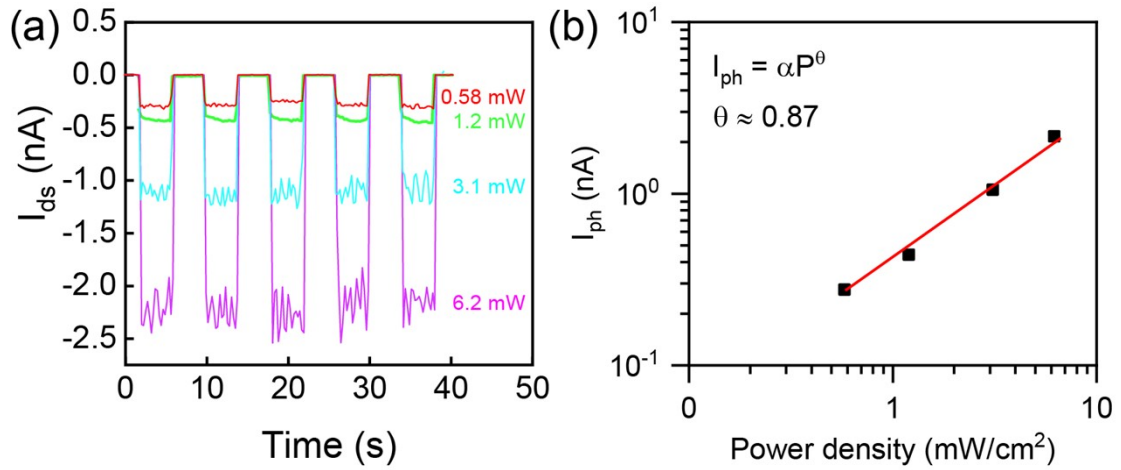

Figure S10 (a) Photocurrent trace of the device illuminated by a chopped light with a frequency of 0.25 Hz at  $V_{ds} = 0$  V and  $V_{gs} = 0$  V. (b) Gate-voltage ( $V_{gs}$ ) dependent open-circuit voltage ( $V_{oc}$ ) in the Fe-PV heterojunction under 670 nm light.

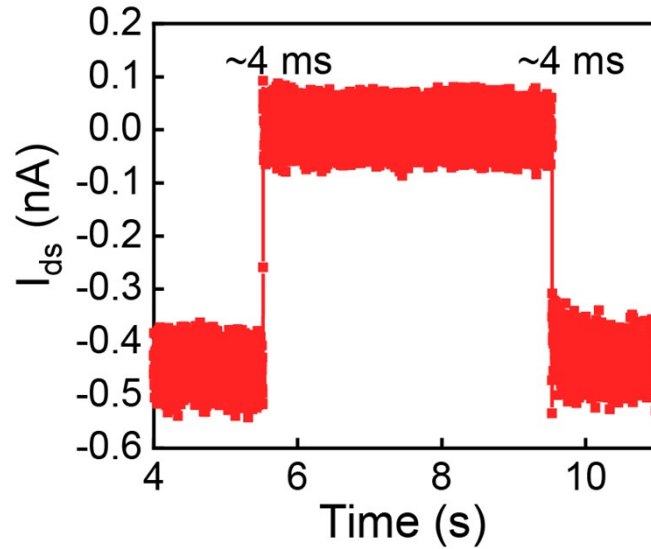

Figure S11 Response time (rise and decay time) of the Fe-PV heterojunction.
